# Supplementary material
Source: PubMed Central journal article supplement (PMC3564416)
Supplement: clpt2012209x3.pdf [file clpt2012209x3.pdf]

### Supplementary Table S3: Available Testing Options

| Test site                                                                                                                                                                                                                                                        | Method                                     |
|------------------------------------------------------------------------------------------------------------------------------------------------------------------------------------------------------------------------------------------------------------------|--------------------------------------------|
| Immunogenetics laboratory, Puget Sound Blood Center, Washington USA<br><a href="http://www.psbcb.org/lab_immunogenetics/test25.htm">http://www.psbcb.org/lab_immunogenetics/test25.htm</a>                                                                       | sequence specific priming PCR              |
| UMass Memorial Medical Center, Clinical Laboratories, Massachusetts, USA<br><a href="http://www.umassmemoriallabs.org/lab-services/histocompatibility-hla">http://www.umassmemoriallabs.org/lab-services/histocompatibility-hla</a>                              |                                            |
| Transplant Immunology and Histocompatibility Laboratories<br>UT Southwestern Medical Center, Texas, USA<br><a href="http://www.utsouthwestern.edu/utsw/cda/dept131762/files/487379.html">http://www.utsouthwestern.edu/utsw/cda/dept131762/files/487379.html</a> | high resolution sequence based typing      |
| Immco, Buffalo, New York, USA and Burlington, Ontario, Canada<br><a href="http://www.immcoiagnostics.com">www.immcoiagnostics.com</a>                                                                                                                            |                                            |
| Pharmigene, Inc., Taipei, Taiwan and California, USA<br><a href="http://www.pharmigene.com/genetic_tests/genetic_tests_Allopurinol.htm">http://www.pharmigene.com/genetic_tests/genetic_tests_Allopurinol.htm</a>                                                | RT-PCR & SYBR Green based detection method |
